# Supplementary material for: A little bit of Sargassum goes a long way: seafloor observations of Sargassum fluitans and Sargassum natans in the Western Atlantic Ocean
Source: Frontiers journal article supplement (doi:10.3389/fmars.2023.1250150), 2023-12-07
Supplement: Table_1.XLSX [file Table_1.XLSX]

## Sheet: Sheet1
Dive #	Site #/Name	Site Description	Date	On Bottom Latitude	On Bottom Longitude	Depth Range (m)	Horizontal Distance Covered (m)	Bottom time (h:min)	Total # of Sargassum observations	# Sargassum observations per 100m
EX1803 Dive 6	DeSoto Canyon (Gulf of Mexico)	Up a steep mound (mount surrounded by flat area) which has a prominent ridge on the crest of the mound. Follow prominent ridge on crest of mound Rock outcrops Bacterial mats Bivalves (some feeding on sargassum) Large depressions and pockmarks Heavily sedimented, slight current, high turbidity in the water column	2018-04-19	27.096	-92.8207	1050 - 1104	932	05:59:00	30	3.21888
EX1803 Dive 8	DeSoto Canyon (Gulf of Mexico)	Escarpment feature Steep, rocky Multiple large rocks with no enrusting fauna Dense pteropod shell aggregations near landing site Carbonate rock that ranged in size from cobble to large boulders. Terrace with relatively gentle slopes and a blanket of sediment cover	2018-04-25	28.2837	-87.222989	2315 - 2635	469	05:25:00	7	1.49254
EX1811 Dive 6	U.S. Caribbean Punta Yeguas, Puerto Rico	Dive site relatively close to shore Mound feature of steep hardground with intermittent flat sedimented plateaus Flat area dominated by soft sediment Much anthropogenic debris as well as seagrass and Sargassum scattered along the seafloor	2018-11-06	18.0139	-65.731	636 - 877	389	07:10:00	16	4.11311
EX1811 Dive 7	U.S. Caribbean Caja de Muertos Island	Steep slope (40 degrees) to gentle slope area then up a mound feature The dive started in a habitat dominated by soft sediment with a few boulders Transitions between larger boulders to smaller boulders to soft sediment At beginning of dive small clumps of sargassum were slowly tumbling along the sediment, which has not been observed on other dives Many observations of turtlegrass in beginning of…	2018-11-07	17.8244	-66.5675	401 - 535	572	04:35:00	19	3.32168
EX1811 Dive 8	U.S. Caribbean South of La Parguera	Gentle slope dominated by soft sediment Many pieces of wood fall and other organic debris, like seagrass blades and Sargassum. Seafloor largeley homegeneous in composition. No hard substrate was observed. Scours and burrows were common in this area Sargassum abundantly scattered at beginning of dive on flat surface * Science watch lead mentioned that the sargassum on the surface had been a bit of…	2018-11-08	17.852	-67.0553	804 - 1101	997	06:57:00	112	11.2337
EX1811 Dive 10	Mona Canyon (U.S. Caribbean)	steep, along canyon wall, most of this dive pretty steep slope, up to 60 degrees, slope of canyon, channel debris, organic (sargassum) as well as anthropogenic Among the north side of the Mona passage in the Mona canyon, exposed to the greater north atlantic ocean. Bottom started with lots of sargassum detritus, when it got to steeper features (large rocks on a steep canyone wall face, rock fall,…	2018-11-10	18.7512	-67.587	2536 - 2766	659	03:36:00	25	3.79363
EX1903L2 Dive 2	Stetson Mesa South Mounds (Southeast U.S.)	High level of marine snow in water column Coral mounds with coral rubble and soft sediment, with a higher percentage of coral rubble observed compared to sediment On this dive an urchin was observed grazing on sargassum	2019-06-22	29.1142	-79.4477	728 -784	1041	05:44:00	16	1.53698
EX1903L2 Dive 11	"Dodge" Canyon (Southeast U.S.)	Canyon dive High level of sediment and turbidity in the water column for the majority of the descent and throughout the dive, high level of marine snow Soft, heavily sedimented silty bottom. Seafloor continued to be heavily sedimented, even while traversing up a relatively steep slope (>30 degrees). Canyon features continued to be heavily sedimented with almost no organisms actually attached and …	2019-07-03	35.6245	-74.7477	1209 - 1348	251	03:29:00	6	2.39044
EX1907 Dive11	Key West Deep, Southeast U.S.	Two small mounds about 5 meters high and an escarpment (large boulder/rock wall) Sandy between mounds. Large terraces on escarpment with unconsolidated sediment cover Many little mounds from bioturbation Vast majority of dive was exploring near vertical inclines on the boulders and escarpment feature, and on the little horizontal sandy surface that was explored sargassum was observed One patch of…	2019-11-18	23.976	-81.9322	1168 - 1208	927	06:08:00	6	0.647249
EX1907 Dive 12	"Berg Bits", Southeast U.S.	Two mound features Sandy plateau Escarpment Coral rubble on mound slopes along with much seagrass Most of the horizontal movement was done in transit from one feature to the next, so the ROV was moving fairly quickly and did not stop and zoom on features to allow a positive id for Sargassum. There was a lot of material that could be Sargassum but with the speed and distance from the ROV determina…	2019-11-19	23.9841	-83.3862	927 - 973	1120	06:51:00	0	0
	* For dives like this with abundant Sargassum, a new Sargassum annotation was made for every new frame of view that contained Sargassum. For instance, even if there were 10 clumps of Sargassum in frame, this was counted as one sargassum annotation. As soon as the ROV that had Sargassum in its frame of view that was not clearly visible in the previous annotation, this was entered as a new annotati…
