# Supplementary material for: A little bit of Sargassum goes a long way: seafloor observations of Sargassum fluitans and Sargassum natans in the Western Atlantic Ocean
Source: Frontiers journal article supplement (doi:10.3389/fmars.2023.1250150), 2023-12-07
Supplement: Table_2.XLSX [file Table_2.XLSX]

## Sheet: Sheet1
Dive Name	Cruise Name	Timestamp	Depth (m)	Latitude	Longitude	Oxygen	Temperature	Salinity	Sargassum/Likely Sargassum	Biomass (high/medium/low)	Biomass Scale (1-2 low, 3-4 medium, 5-8 high)	Type of substrate	Animal Present (to nearest Order/Class)	Comments
EX1803_Dive06	NOAA OER Gulf of Mexico 2018 (EX1803)	20180419T145815.000Z	1103.72	27.0961	-92.8207	4.09762	4.79947	34.9449	Sargassum	low	1	Rock, sediment	Bivalvia
EX1803_Dive06	NOAA OER Gulf of Mexico 2018 (EX1803)	20180419T150158.000Z	1102.02	27.0961	-92.8207	4.10276	4.78714	34.9428	Sargassum	low	1	Rock, sediment	No	In small gully
EX1803_Dive06	NOAA OER Gulf of Mexico 2018 (EX1803)	20180419T150211.000Z	1101.94	27.0961	-92.8207	4.10045	4.78893	34.9427	Sargassum	low	1	Rock, sediment	No	In gully
EX1803_Dive06	NOAA OER Gulf of Mexico 2018 (EX1803)	20180419T150510.000Z	1102.35	27.0961	92.8208	4.09208	4.79952	34.9444	Sargassum	medium	2	Rock, sediment	Bivalve shells, Actinopterygii	Anthropogenic debris
EX1803_Dive06	NOAA OER Gulf of Mexico 2018 (EX1803)	20180419T150529.000Z	1102.22	27.0961	-92.8208	4.09128	4.79263	34.9425	Likely Sargassum	medium	2	Rock, sediment, bacterial mat	Bivalve shells, Actinopterygii	Anthropogenic debris
EX1803_Dive06	NOAA OER Gulf of Mexico 2018 (EX1803)	20180419T151330.000Z	1100.98	27.096	-92.821	4.09911	4.79599	34.9382	Sargassum	low	1	Rock, sediment	Bivalve shells
EX1803_Dive06	NOAA OER Gulf of Mexico 2018 (EX1803)	20180419T152517.000Z	1094.41	27.0958	-92.8208	4.09366	4.79279	34.9421	Sargassum	medium	2	Rock, sediment	Bivalvia, Decapoda
EX1803_Dive06	NOAA OER Gulf of Mexico 2018 (EX1803)	20180419T152705.000Z	1095.7	27.0958	-92.8207	4.09151	4.78709	34.9432	Sargassum	medium	1	Rock, sediment	Bivalvia, Decapoda
EX1803_Dive06	NOAA OER Gulf of Mexico 2018 (EX1803)	20180419T154649.000Z	1080.42	27.0954	-92.821	4.08519	4.7923	34.9446	Sargassum	low	1	Rock, sediment	No
EX1803_Dive06	NOAA OER Gulf of Mexico 2018 (EX1803)	20180419T155309.000Z	1075.04	27.0953	-92.8212	4.08139	4.79931	34.9421	Likely Sargassum	low	1	Rock, sediment	No
EX1803_Dive06	NOAA OER Gulf of Mexico 2018 (EX1803)	20180419T155854.000Z	1073	27.0953	-92.8213	4.07952	4.79806	34.9431	Sargassum	low	1	Rock, sediment	Actinopterygii
EX1803_Dive06	NOAA OER Gulf of Mexico 2018 (EX1803)	20180419T160023.000Z	1071.52	27.0953	-92.8214	4.07412	4.79882	34.9426	Sargassum	low	1	Rock, sediment	Gastropoda	Gastropod appears to be grazing on Sargassum
EX1803_Dive06	NOAA OER Gulf of Mexico 2018 (EX1803)	20180419T160113.000Z	1071.48	27.0954	-92.8214	4.07357	4.80077	34.9424	Sargassum	low	1	Rock, sediment	No
EX1803_Dive06	NOAA OER Gulf of Mexico 2018 (EX1803)	20180419T161934.000Z	1067.57	27.095	-92.8217	4.07749	4.79757	34.9413	Sargassum	low	2	Rock, sediment	No
EX1803_Dive06	NOAA OER Gulf of Mexico 2018 (EX1803)	20180419T162111.000Z	1067.52	27.095	-92.8217	4.07711	4.80702	34.9389	Sargassum	low	2	Rock, sediment	Decapoda
EX1803_Dive06	NOAA OER Gulf of Mexico 2018 (EX1803)	20180419T162322.000Z	1066.73	27.0949	-92.8217	4.07716	4.79789	34.9428	Sargassum	low	1	Rock, sediment	Decapoda
EX1803_Dive06	NOAA OER Gulf of Mexico 2018 (EX1803)	20180419T164718.000Z	1059.03	27.0946	-92.8219	4.06797	4.80566	34.9427	Sargassum	low	1	Rock, sediment	No
EX1803_Dive06	NOAA OER Gulf of Mexico 2018 (EX1803)	20180419T181005.000Z	1056.26	27.0937	-92.8219	4.04548	4.8176	34.9422	Sargassum	low	1	Rock, sediment	Bivalve shells
EX1803_Dive06	NOAA OER Gulf of Mexico 2018 (EX1803)	20180419T183525.000Z	1054.36	27.0934	-92.8217	4.03961	4.82954	34.9408	Sargassum	low	1	Rock, sediment	Decapoda
EX1803_Dive06	NOAA OER Gulf of Mexico 2018 (EX1803)	20180419T190414.000Z	1066.89	27.0927	-92.8223	4.06975	4.78714	34.9424	Likely Sargassum	low	1	Rock, sediment, bacterial mat	Bivalve shells	In gully
EX1803_Dive06	NOAA OER Gulf of Mexico 2018 (EX1803)	20180419T190446.000Z	1067.37	27.0926	-92.8222	4.06979	4.78725	34.9435	Sargassum	low	1	Rock, sediment, bacterial mat	Bivalve shells	In gully
EX1803_Dive06	NOAA OER Gulf of Mexico 2018 (EX1803)	20180419T193719.000Z	1070.51	27.0921	-92.8221	4.03512	4.82129	34.9432	Sargassum	low	1	Bed of bivalve shells at base of steep slope	Bivalve shells
EX1803_Dive06	NOAA OER Gulf of Mexico 2018 (EX1803)	20180419T194153.000Z	1070.28	27.0921	-92.822	4.03401	4.83432	34.9387	Sargassum	low	1	Bed of bivalve shells on slope	Bivalve shells
EX1803_Dive06	NOAA OER Gulf of Mexico 2018 (EX1803)	20180419T202923.000Z	1082.2	27.0912	-92.8225	4.04749	4.81825	34.9436	Likely Sargassum	low	1	Rock, sediment	Bivalve shells
EX1803_Dive06	NOAA OER Gulf of Mexico 2018 (EX1803)	20180419T203156.000Z	1076.06	27.091	-92.8227	4.04828	4.81055	34.9418	Sargassum	low	1	Rock, sediment	Decapoda
EX1803_Dive06	NOAA OER Gulf of Mexico 2018 (EX1803)	20180419T203605.000Z	1073.75	27.0911	-92.823	4.04711	4.80332	34.9421	Likely Sargassum	low	1	Rock, sediment	No
EX1803_Dive06	NOAA OER Gulf of Mexico 2018 (EX1803)	20180419T204145.000Z	1071.56	27.0909	-92.8231	4.05895	4.80316	34.9423	Sargassum	low	1	Rock, sediment	No
EX1803_Dive06	NOAA OER Gulf of Mexico 2018 (EX1803)	20180419T204346.000Z	1070.48	27.091	-92.8233	4.05775	4.80142	34.9425	Sargassum	low	1	Rock, sediment	No
EX1803_Dive06	NOAA OER Gulf of Mexico 2018 (EX1803)	20180419T204635.000Z	1068.93	27.0908	-92.8234	4.05199	4.80332	34.942	Sargassum	low	2	Rock, sediment	No	Sargassum in small depression
EX1803_Dive06	NOAA OER Gulf of Mexico 2018 (EX1803)	20180419T204714.000Z	1069.28	27.0907	-92.8234	4.04984	4.80685	34.9424	Sargassum	low	1	Rock, sediment	No
EX1803_Dive08	NOAA OER Gulf of Mexico 2018 (EX1803)	20180425T151053.000Z	2632.01	28.2837	-87.2231	4.59725	4.33044	34.972	Likely Sargassum	low	1	Rocky rubble	No
EX1803_Dive08	NOAA OER Gulf of Mexico 2018 (EX1803)	20180425T152326.000Z	2629.11	28.2838	-87.2231	4.61121	4.33039	34.9715	Likely Sargassum	low	1	Rocky rubble	No
EX1803_Dive08	NOAA OER Gulf of Mexico 2018 (EX1803)	20180425T164906.000Z	2543.41	28.2842	-87.2245	4.58317	4.32289	34.9717	Sargassum	low	1	Steep rock wall	No
EX1803_Dive08	NOAA OER Gulf of Mexico 2018 (EX1803)	20180425T173102.000Z	2502.15	28.2848	-87.225	4.58174	4.3189	34.9716	Sargassum	low	2	Steep rock wall	No
EX1803_Dive08	NOAA OER Gulf of Mexico 2018 (EX1803)	20180425T173638.000Z	2494.69	28.2849	-87.225	4.58331	4.31983	34.9717	Sargassum	low	1	Steep rock wall	Decapoda
EX1803_Dive08	NOAA OER Gulf of Mexico 2018 (EX1803)	20180425T173722.000Z	2494.69	28.285	-87.225	4.58293	4.3178	34.9718	Sargassum	low	1	Steep rock wall	Decapoda
EX1803_Dive08	NOAA OER Gulf of Mexico 2018 (EX1803)	20180425T180557.000Z	2442.14	28.2853	-87.2249	4.55886	4.32377	34.9712	Likely Sargassum	low	2	Ledge on rock wall	No
EX1811_Dive06	NOAA OER Océano Profundo 2018 (EX1811)	20181106T131744.000Z	873.739	18.0143	-65.7304	3.16242	6.5434	34.9017	Sargassum	low	2	Sediment, marine snow	Holothuria	Anthropogenic debris
EX1811_Dive06	NOAA OER Océano Profundo 2018 (EX1811)	20181106T132131.000Z	875.966	18.0144	-65.7304	3.17031	6.53373	34.9017	Sargassum	low	2	Sediment, marine snow	Porifera
EX1811_Dive06	NOAA OER Océano Profundo 2018 (EX1811)	20181106T132259.000Z	876.407	18.0144	-65.7303	3.16914	6.53246	34.9021	Sargassum	low	1	Sediment, marine snow	Holothuria
EX1811_Dive06	NOAA OER Océano Profundo 2018 (EX1811)	20181106T132453.000Z	877.653	18.0144	-65.7302	3.16602	6.52199	34.9014	Sargassum	low	2	Sediment, marine snow	Decapoda
EX1811_Dive06	NOAA OER Océano Profundo 2018 (EX1811)	20181106T133124.000Z	876.919	18.0145	-65.7303	3.18114	6.51506	34.9009	Sargassum	low	1	Sediment, marine snow	No
EX1811_Dive06	NOAA OER Océano Profundo 2018 (EX1811)	20181106T134654.000Z	866.065	18.0146	-65.7302	3.16438	6.55402	34.9015	Likely Sargassum	low	1	Ledge on rock mound, marine snow	Actinopterygii
EX1811_Dive06	NOAA OER Océano Profundo 2018 (EX1811)	20181106T140912.000Z	848.211	18.0147	-65.73	2.95789	7.10755	34.9317	Sargassum	low	1	Ledge on rock mound, marine snow	No
EX1811_Dive06	NOAA OER Océano Profundo 2018 (EX1811)	20181106T154134.000Z	747.145	18.0158	-65.7294	2.80314	7.69157	34.9556	Sargassum	low	1	Sediment, marine snow	No
EX1811_Dive06	NOAA OER Océano Profundo 2018 (EX1811)	20181106T161556.000Z	707.306	18.0164	-65.7294	2.73941	7.98063	34.9785	Sargassum	low	1	Sediment, marine snow	Decapoda
EX1811_Dive06	NOAA OER Océano Profundo 2018 (EX1811)	20181106T171827.000Z	671.475	18.0179	-65.7293	2.64015	9.08961	35.0934	Sargassum	low	1	Sediment, marine snow	Congridae
EX1811_Dive06	NOAA OER Océano Profundo 2018 (EX1811)	20181106T172347.000Z	668.284	18.0181	-65.7294	2.64671	9.08407	35.0937	Sargassum	low	1	Sediment, marine snow	No
EX1811_Dive06	NOAA OER Océano Profundo 2018 (EX1811)	20181106T173236.000Z	664.475	18.0185	-65.7295	2.64387	9.08178	35.0932	Sargassum	low	1	Sediment, marine snow	Actinopterygii
EX1811_Dive06	NOAA OER Océano Profundo 2018 (EX1811)	20181106T184641.000Z	645.945	18.0196	-65.7308	2.62503	9.51686	35.1317	Sargassum	low	1	Sediment, marine snow	No
EX1811_Dive06	NOAA OER Océano Profundo 2018 (EX1811)	20181106T191511.000Z	637.972	18.02	-65.7316	2.61468	9.77109	35.1842	Likely Sargassum	low	2	Sediment, marine snow	No
EX1811_Dive06	NOAA OER Océano Profundo 2018 (EX1811)	20181106T195514.000Z	639.139	18.02	-65.732	2.61213	9.94671	35.2085	Sargassum	low	1	Sediment, marine snow	Velatida
EX1811_Dive06	NOAA OER Océano Profundo 2018 (EX1811)	20181106T200048.000Z	639.255	18.0201	-65.732	2.62522	10.0207	35.2136	Sargassum	low	1	Sediment, rock, marine snow	Ophiacanthida, Cidaroida
EX1811_Dive07	NOAA OER Océano Profundo 2018 (EX1811)	20181107T173117.000Z	534.968	17.8242	-66.5675	3.06956	13.3416	35.6149	Sargassum	low	2	Sediment, marine snow	No	Sargassum slowly tumbling
EX1811_Dive07	NOAA OER Océano Profundo 2018 (EX1811)	20181107T173816.000Z	534.47	17.8243	-66.5674	3.04788	13.078	35.6263	Sargassum	low	1	Sediment, marine snow	Cidaroida	Urchin appears to be grazing on Sargassum
EX1811_Dive07	NOAA OER Océano Profundo 2018 (EX1811)	20181107T174213.000Z	529.165	17.8244	-66.5673	3.09201	13.4756	35.6483	Sargassum	low	2	Sediment, marine snow	No
EX1811_Dive07	NOAA OER Océano Profundo 2018 (EX1811)	20181107T175615.000Z	523.35	17.8247	-66.567	3.07995	13.3857	35.7146	Sargassum	low	1	Sediment, marine snow	No
EX1811_Dive07	NOAA OER Océano Profundo 2018 (EX1811)	20181107T180717.000Z	515.394	17.8248	-66.5669	3.07982	13.4611	35.6628	Sargassum	high	7	Boulders, sediment, marine snow	Congridae, Decapoda	Sargassum appears degraded
EX1811_Dive07	NOAA OER Océano Profundo 2018 (EX1811)	20181107T181041.000Z	514.823	17.8248	-66.5668	3.08884	13.4776	35.6525	Sargassum	low	1	Sediment, marine snow	No
EX1811_Dive07	NOAA OER Océano Profundo 2018 (EX1811)	20181107T182001.000Z	507.43	17.8249	-66.5667	3.13842	13.7026	35.6503	Sargassum	low	1	Sediment, marine snow	No
EX1811_Dive07	NOAA OER Océano Profundo 2018 (EX1811)	20181107T190748.000Z	469.886	17.825	-66.5664	3.33286	14.6875	35.8354	Sargassum	low	1	Steep rocky ridge, marine snow	No
EX1811_Dive07	NOAA OER Océano Profundo 2018 (EX1811)	20181107T190959.000Z	465.955	17.825	-66.5665	3.36174	14.8713	35.8531	Sargassum	low	2	Steep rocky ridge, marine snow	No
EX1811_Dive07	NOAA OER Océano Profundo 2018 (EX1811)	20181107T191508.000Z	449.747	17.825	-66.5664	3.42656	15.2365	35.9525	Sargassum	high	8	Steep rocky ridge, marine snow	No
EX1811_Dive07	NOAA OER Océano Profundo 2018 (EX1811)	20181107T191623.000Z	447	17.825	-66.5663	3.42847	15.2132	35.9713	Sargassum	high	6	Steep rocky ridge, marine snow	Hexactinellida
EX1811_Dive07	NOAA OER Océano Profundo 2018 (EX1811)	20181107T191638.000Z	446.956	17.825	-66.5663	3.43225	15.1964	35.9707	Sargassum	medium	3	Steep rocky ridge, marine snow	Hexactinellida
EX1811_Dive07	NOAA OER Océano Profundo 2018 (EX1811)	20181107T191840.000Z	446.211	17.8251	-66.5663	3.44004	15.1924	36.0038	Sargassum	low	1	Steep rocky ridge, marine snow	Hexactinellida
EX1811_Dive07	NOAA OER Océano Profundo 2018 (EX1811)	20181107T192819.000Z	442.485	17.8253	-66.5661	3.41515	15.1603	36.01	Sargassum	low	1	Sediment, marine snow	No
EX1811_Dive07	NOAA OER Océano Profundo 2018 (EX1811)	20181107T192936.000Z	441.753	17.8253	-66.5661	3.44537	15.2208	36.022	Sargassum	low	1	Sediment, marine snow	Spirularia
EX1811_Dive07	NOAA OER Océano Profundo 2018 (EX1811)	20181107T200444.000Z	434.389	17.8255	-66.566	3.44756	15.3417	35.9858	Sargassum	low	1	Sediment, slope with boulders, marine snow	Actinopterygii
EX1811_Dive07	NOAA OER Océano Profundo 2018 (EX1811)	20181107T202508.000Z	422.938	17.8261	-66.5657	3.50838	15.6103	36.0775	Sargassum	low	2	Sediment, slope with boulders, marine snow	No
EX1811_Dive07	NOAA OER Océano Profundo 2018 (EX1811)	20181107T202813.000Z	420.263	17.826	-66.5657	3.50459	15.6136	36.0887	Sargassum	low	1	Sediment, slope with boulders, marine snow	No
EX1811_Dive07	NOAA OER Océano Profundo 2018 (EX1811)	20181107T203739.000Z	416.802	17.8261	-66.5657	3.58112	15.9028	36.0753	Sargassum	low	1	Sediment, slope with boulders, marine snow	No
EX1811_Dive08	NOAA OER Océano Profundo 2018 (EX1811)	20181108T130425.000Z	1099.68	17.852	-67.0549	4.13172	4.97142	34.9511	Sargassum	high	8	Sediment, marine snow	No	Multiple clumps of Sargassum
EX1811_Dive08	NOAA OER Océano Profundo 2018 (EX1811)	20181108T130514.000Z	1099.9	17.852	-67.0549	4.14337	4.97283	34.9516	Sargassum	high	8	Sediment, marine snow	No	Multiple clumps of Sargassum
EX1811_Dive08	NOAA OER Océano Profundo 2018 (EX1811)	20181108T130825.000Z	1101.35	17.852	-67.0549	4.1326	4.97955	34.9517	Sargassum	high	8	Sediment, marine snow	No	Multiple clumps of Sargassum
EX1811_Dive08	NOAA OER Océano Profundo 2018 (EX1811)	20181108T131207.000Z	1096.5	17.852	-67.0549	4.13505	4.9861	34.9513	Sargassum	low	1	Sediment, marine snow	Ophiurida, Decapoda
EX1811_Dive08	NOAA OER Océano Profundo 2018 (EX1811)	20181108T131412.000Z	1095.73	17.8521	-67.0547	4.12807	4.98935	34.9506	Sargassum	medium	3	Sediment, marine snow	Decapodiformes
EX1811_Dive08	NOAA OER Océano Profundo 2018 (EX1811)	20181108T131641.000Z	1093.53	17.8521	-67.0547	4.12749	4.99714	34.9516	Sargassum	low	1	Sediment, marine snow	Holothuroidea
EX1811_Dive08	NOAA OER Océano Profundo 2018 (EX1811)	20181108T131742.000Z	1093.55	17.8521	-67.0547	4.13141	5.00174	34.9528	Sargassum	high	5	Sediment, marine snow	No	Multiple clumps of Sargassum
EX1811_Dive08	NOAA OER Océano Profundo 2018 (EX1811)	20181108T131759.000Z	1093.53	17.8521	-67.0547	4.12413	5.00017	34.9504	Sargassum	high	5	Sediment, marine snow	No	Multiple clumps of Sargassum
EX1811_Dive08	NOAA OER Océano Profundo 2018 (EX1811)	20181108T131902.000Z	1091.71	17.8521	-67.0547	4.12512	5.00515	34.951	Sargassum	low	1	Sediment, marine snow	Actinopterygii
EX1811_Dive08	NOAA OER Océano Profundo 2018 (EX1811)	20181108T131938.000Z	1091.73	17.8521	-67.0547	4.10546	5.01825	34.9502	Sargassum	high	6	Sediment, marine snow	No
EX1811_Dive08	NOAA OER Océano Profundo 2018 (EX1811)	20181108T132119.000Z	1089.51	17.8521	-67.0547	4.11201	5.01923	34.9511	Sargassum	medium	3	Sediment, marine snow	Asteroidea
EX1811_Dive08	NOAA OER Océano Profundo 2018 (EX1811)	20181108T132210.000Z	1088.91	17.8521	-67.0547	4.10862	5.01923	34.9509	Sargassum	low	1	Sediment, marine snow	Decapoda, Gastropoda
EX1811_Dive08	NOAA OER Océano Profundo 2018 (EX1811)	20181108T132326.000Z	1087.43	17.8521	-67.0547	4.08581	5.03908	34.9506	Sargassum	high	7	Sediment, marine snow	No
EX1811_Dive08	NOAA OER Océano Profundo 2018 (EX1811)	20181108T132415.000Z	1086.08	17.8521	-67.0547	4.09676	5.038	34.9503	Sargassum	medium	4	Sediment, marine snow	No
EX1811_Dive08	NOAA OER Océano Profundo 2018 (EX1811)	20181108T132543.000Z	1084.88	17.8521	-67.0547	4.09139	5.05185	34.9495	Sargassum	low	2	Sediment, marine snow	No
EX1811_Dive08	NOAA OER Océano Profundo 2018 (EX1811)	20181108T132702.000Z	1084.02	17.8521	-67.0546	4.08246	5.05374	34.9496	Sargassum	medium	3	Sediment, marine snow	No
EX1811_Dive08	NOAA OER Océano Profundo 2018 (EX1811)	20181108T132754.000Z	1081.14	17.8521	-67.0545	4.08793	5.06915	34.949	Sargassum	low	1	Sediment, marine snow	No
EX1811_Dive08	NOAA OER Océano Profundo 2018 (EX1811)	20181108T133228.000Z	1075.29	17.8521	-67.0545	4.06976	5.08813	34.9484	Sargassum	low	1	Sediment, marine snow	No
EX1811_Dive08	NOAA OER Océano Profundo 2018 (EX1811)	20181108T133824.000Z	1070.17	17.8521	-67.0544	3.987	5.20408	34.9449	Sargassum	low	1	Sediment, marine snow	No
EX1811_Dive08	NOAA OER Océano Profundo 2018 (EX1811)	20181108T133840.000Z	1070.57	17.8521	-67.0544	3.9876	5.20301	34.9438	Sargassum	low	1	Sediment, marine snow	Decapoda	Sargassum at entrance of burrow
EX1811_Dive08	NOAA OER Océano Profundo 2018 (EX1811)	20181108T134921.000Z	1047.94	17.8521	-67.054	3.82121	5.46638	34.9346	Sargassum	low	1	Sediment, marine snow	Holothuroidea
EX1811_Dive08	NOAA OER Océano Profundo 2018 (EX1811)	20181108T135313.000Z	1046.22	17.8521	-67.054	3.80858	5.46654	34.9359	Sargassum	low	1	Sediment, marine snow	Decapoda
EX1811_Dive08	NOAA OER Océano Profundo 2018 (EX1811)	20181108T140032.000Z	1043.94	17.8521	-67.054	3.81093	5.46907	34.9345	Sargassum	medium	4	Sediment, marine snow	Decapoda
EX1811_Dive08	NOAA OER Océano Profundo 2018 (EX1811)	20181108T140253.000Z	1042.95	17.8521	-67.054	3.80627	5.46864	34.9347	Sargassum	low	2	Sediment, marine snow	No
EX1811_Dive08	NOAA OER Océano Profundo 2018 (EX1811)	20181108T141725.000Z	1035.39	17.8522	-67.0537	3.77629	5.49926	34.932	Sargassum	medium	3	Sediment, marine snow	No	Near wood fall
EX1811_Dive08	NOAA OER Océano Profundo 2018 (EX1811)	20181108T142007.000Z	1034.81	17.8522	-67.0537	3.76557	5.52149	34.9311	Sargassum	low	1	Sediment, marine snow	No	Near wood fall
EX1811_Dive08	NOAA OER Océano Profundo 2018 (EX1811)	20181108T142350.000Z	1035.38	17.8524	-67.0536	3.76708	5.51473	34.9319	Sargassum	low	2	Sediment, marine snow	No	Sargassum in depression in sediment
EX1811_Dive08	NOAA OER Océano Profundo 2018 (EX1811)	20181108T142449.000Z	1033.45	17.8525	-67.0536	3.76881	5.51167	34.9308	Sargassum	medium	3	Sediment, marine snow	No
EX1811_Dive08	NOAA OER Océano Profundo 2018 (EX1811)	20181108T142818.000Z	1029.2	17.8524	-67.0536	3.74916	5.53191	34.9297	Sargassum	low	1	Sediment, marine snow	No
EX1811_Dive08	NOAA OER Océano Profundo 2018 (EX1811)	20181108T143315.000Z	1023.2	17.8526	-67.0535	3.7564	5.52568	34.9307	Sargassum	low	1	Sediment, marine snow	No
EX1811_Dive08	NOAA OER Océano Profundo 2018 (EX1811)	20181108T143537.000Z	1022.96	17.8526	-67.0534	3.76721	5.51908	34.9293	Sargassum	low	1	Sediment, marine snow	Ophidiiformes
EX1811_Dive08	NOAA OER Océano Profundo 2018 (EX1811)	20181108T144145.000Z	1022.88	17.8527	-67.0534	3.76575	5.51994	34.9308	Sargassum	high	6	Sediment, marine snow	No
EX1811_Dive08	NOAA OER Océano Profundo 2018 (EX1811)	20181108T144808.000Z	1012.63	17.8529	-67.0533	3.73835	5.55515	34.932	Sargassum	medium	4	Sediment, marine snow	No
EX1811_Dive08	NOAA OER Océano Profundo 2018 (EX1811)	20181108T144848.000Z	1010.71	17.8529	-67.0533	3.72735	5.56009	34.9275	Sargassum	low	1	Sediment, marine snow	No	Sargassum in depression in sediment
EX1811_Dive08	NOAA OER Océano Profundo 2018 (EX1811)	20181108T145154.000Z	1007.97	17.8529	-67.0532	3.73869	5.54764	34.9298	Sargassum	low	1	Sediment, marine snow	Actinopterygii
EX1811_Dive08	NOAA OER Océano Profundo 2018 (EX1811)	20181108T145739.000Z	996.666	17.8531	-67.0532	3.71715	5.58289	34.9258	Sargassum	low	1	Sediment, marine snow	Actinopterygii
EX1811_Dive08	NOAA OER Océano Profundo 2018 (EX1811)	20181108T145909.000Z	994.988	17.8531	-67.0532	3.71057	5.58702	34.9267	Sargassum	low	1	Sediment, marine snow	Actinopterygii
EX1811_Dive08	NOAA OER Océano Profundo 2018 (EX1811)	20181108T150117.000Z	994.381	17.8532	-67.0531	3.70369	5.60675	34.9204	Sargassum	low	1	Sediment, marine snow	No
EX1811_Dive08	NOAA OER Océano Profundo 2018 (EX1811)	20181108T150252.000Z	992.496	17.8532	-67.0531	3.70278	5.60096	34.9256	Sargassum	low	1	Sediment, marine snow	Medusozoa
EX1811_Dive08	NOAA OER Océano Profundo 2018 (EX1811)	20181108T150634.000Z	986.162	17.8534	-67.053	3.56736	5.77336	34.9139	Sargassum	low	1	Sediment, marine snow	No
EX1811_Dive08	NOAA OER Océano Profundo 2018 (EX1811)	20181108T150908.000Z	981.999	17.8535	-67.0529	3.52808	5.83323	34.9109	Sargassum	low	1	Sediment, marine snow	No
EX1811_Dive08	NOAA OER Océano Profundo 2018 (EX1811)	20181108T150939.000Z	980.453	17.8535	-67.0529	3.53414	5.83339	34.9097	Sargassum	low	1	Sediment, marine snow	No
EX1811_Dive08	NOAA OER Océano Profundo 2018 (EX1811)	20181108T152154.000Z	954.72	17.8538	-67.0527	3.41074	6.02094	34.9002	Sargassum	low	2	Sediment, marine snow	No
EX1811_Dive08	NOAA OER Océano Profundo 2018 (EX1811)	20181108T152459.000Z	948.316	17.8539	-67.0526	3.39218	6.04512	34.9004	Sargassum	low	2	Sediment, marine snow	No
EX1811_Dive08	NOAA OER Océano Profundo 2018 (EX1811)	20181108T152734.000Z	943.005	17.8539	-67.0526	3.3767	6.05913	34.8997	Sargassum	low	1	Sediment, marine snow	No
EX1811_Dive08	NOAA OER Océano Profundo 2018 (EX1811)	20181108T153254.000Z	940.724	17.8541	-67.0525	3.36125	6.08276	34.8982	Sargassum	low	1	Sediment, marine snow	Decapoda
EX1811_Dive08	NOAA OER Océano Profundo 2018 (EX1811)	20181108T153444.000Z	936.986	17.8542	-67.0525	3.36137	6.08644	34.8981	Sargassum	low	2	Sediment, marine snow	No
EX1811_Dive08	NOAA OER Océano Profundo 2018 (EX1811)	20181108T153650.000Z	932.219	17.8542	-67.0525	3.35363	6.09495	34.8965	Sargassum	medium	4	Sediment, marine snow	No	Multiple clumps of Sargassum
EX1811_Dive08	NOAA OER Océano Profundo 2018 (EX1811)	20181108T154017.000Z	928.576	17.8542	-67.0525	3.32937	6.12693	34.8943	Sargassum	low	1	Sediment, marine snow	Asteroidea
EX1811_Dive08	NOAA OER Océano Profundo 2018 (EX1811)	20181108T154709.000Z	921.454	17.8544	-67.0523	3.29456	6.17478	34.892	Sargassum	low	2	Sediment, marine snow	No	Sargassum in small depression
EX1811_Dive08	NOAA OER Océano Profundo 2018 (EX1811)	20181108T155707.000Z	912.907	17.8546	-67.0521	3.27937	6.20055	34.8906	Sargassum	low	1	Sediment, marine snow	Crinoidea
EX1811_Dive08	NOAA OER Océano Profundo 2018 (EX1811)	20181108T160609.000Z	908.834	17.8546	-67.0521	3.27265	6.21474	34.8899	Sargassum	low	2	Sediment, marine snow	Poecilosclerida,
EX1811_Dive08	NOAA OER Océano Profundo 2018 (EX1811)	20181108T164457.000Z	904.082	17.8549	-67.0519	3.20097	6.30376	34.8813	Sargassum	low	1	Sediment, marine snow	Decapoda	Nearby a coconut husk
EX1811_Dive08	NOAA OER Océano Profundo 2018 (EX1811)	20181108T164647.000Z	901.481	17.8549	-67.0519	3.19199	6.30455	34.8811	Sargassum	low	2	Sediment, marine snow	No
EX1811_Dive08	NOAA OER Océano Profundo 2018 (EX1811)	20181108T164929.000Z	899.04	17.855	-67.0518	3.17868	6.33298	34.879	Sargassum	medium	3	Sediment, marine snow	No
EX1811_Dive08	NOAA OER Océano Profundo 2018 (EX1811)	20181108T170358.000Z	897.624	17.855	-67.0518	3.13975	6.40341	34.8757	Sargassum	low	1	Sediment, marine snow	No
EX1811_Dive08	NOAA OER Océano Profundo 2018 (EX1811)	20181108T170909.000Z	898.189	17.855	-67.0518	3.14342	6.39302	34.8767	Sargassum	low	2	Sediment, marine snow	Ceriantharia
EX1811_Dive08	NOAA OER Océano Profundo 2018 (EX1811)	20181108T171409.000Z	897.649	17.855	-67.0518	3.1074	6.45566	34.8749	Sargassum	medium	3	Sediment, marine snow	No
EX1811_Dive08	NOAA OER Océano Profundo 2018 (EX1811)	20181108T172257.000Z	895.234	17.8552	-67.0517	3.10488	6.46529	34.8727	Sargassum	medium	4	Sediment, marine snow	No
EX1811_Dive08	NOAA OER Océano Profundo 2018 (EX1811)	20181108T172537.000Z	893.702	17.8553	-67.0516	3.09769	6.48333	34.8725	Sargassum	medium	3	Sediment, marine snow	No
EX1811_Dive08	NOAA OER Océano Profundo 2018 (EX1811)	20181108T172849.000Z	893.364	17.8553	-67.0516	3.08626	6.49719	34.8731	Sargassum	low	1	Sediment, marine snow	No
EX1811_Dive08	NOAA OER Océano Profundo 2018 (EX1811)	20181108T173225.000Z	892.771	17.8555	-67.0515	3.07859	6.51491	34.8728	Sargassum	low	1	Sediment, marine snow	Ceriantharia
EX1811_Dive08	NOAA OER Océano Profundo 2018 (EX1811)	20181108T173505.000Z	891.423	17.8556	-67.0514	3.09389	6.49185	34.8729	Sargassum	low	1	Sediment, marine snow	No
EX1811_Dive08	NOAA OER Océano Profundo 2018 (EX1811)	20181108T173604.000Z	890.51	17.8556	-67.0514	3.07691	6.50179	34.8733	Sargassum	low	1	Sediment, marine snow	Decapoda
EX1811_Dive08	NOAA OER Océano Profundo 2018 (EX1811)	20181108T175239.000Z	888.854	17.8556	-67.0514	3.14585	6.40595	34.8763	Sargassum	low	1	Sediment, marine snow	No
EX1811_Dive08	NOAA OER Océano Profundo 2018 (EX1811)	20181108T175430.000Z	886.876	17.8557	-67.0513	3.12905	6.41453	34.8745	Sargassum	low	1	Sediment, marine snow	Asteroidea
EX1811_Dive08	NOAA OER Océano Profundo 2018 (EX1811)	20181108T175758.000Z	885.702	17.8558	-67.0512	3.11933	6.44185	34.875	Sargassum	low	1	Sediment, marine snow	No
EX1811_Dive08	NOAA OER Océano Profundo 2018 (EX1811)	20181108T175921.000Z	883.955	17.8559	-67.0512	3.0869	6.48577	34.8733	Sargassum	low	1	Sediment, marine snow	No	Near a wood fall
EX1811_Dive08	NOAA OER Océano Profundo 2018 (EX1811)	20181108T180034.000Z	882.985	17.8558	-67.0512	3.09136	6.47688	34.8766	Sargassum	low	2	Sediment, marine snow	No	Sargassum in small depression
EX1811_Dive08	NOAA OER Océano Profundo 2018 (EX1811)	20181108T180201.000Z	881.814	17.8558	-67.0512	3.06605	6.5286	34.8708	Sargassum	high	5	Sediment, marine snow	No
EX1811_Dive08	NOAA OER Océano Profundo 2018 (EX1811)	20181108T180532.000Z	878.701	17.8558	-67.0512	3.04994	6.5518	34.8711	Sargassum	medium	4	Sediment, marine snow	No	Sargassum in small depression
EX1811_Dive08	NOAA OER Océano Profundo 2018 (EX1811)	20181108T180611.000Z	878.186	17.8558	-67.0512	3.06715	6.53875	34.8713	Sargassum	medium	4	Sediment, marine snow	No	Sargassum in small depression
EX1811_Dive08	NOAA OER Océano Profundo 2018 (EX1811)	20181108T181122.000Z	872.952	17.8561	-67.0512	3.0559	6.54726	34.8711	Sargassum	medium	3	Sediment, marine snow	No
EX1811_Dive08	NOAA OER Océano Profundo 2018 (EX1811)	20181108T182504.000Z	862.571	17.8564	-67.0512	3.04569	6.57531	34.8701	Sargassum	low	1	Sediment, marine snow	No
EX1811_Dive08	NOAA OER Océano Profundo 2018 (EX1811)	20181108T182815.000Z	858.92	17.8565	-67.0512	3.02617	6.6165	34.8694	Sargassum	low	2	Sediment, marine snow	No
EX1811_Dive08	NOAA OER Océano Profundo 2018 (EX1811)	20181108T182927.000Z	857.29	17.8565	-67.0512	3.04096	6.58191	34.8701	Sargassum	high	5	Sediment, marine snow	No
EX1811_Dive08	NOAA OER Océano Profundo 2018 (EX1811)	20181108T183440.000Z	858.11	17.8566	-67.0512	3.03762	6.59955	34.8696	Sargassum	medium	3	Sediment, marine snow	Decapoda	Pieces of eelgrass with the Sargassum
EX1811_Dive08	NOAA OER Océano Profundo 2018 (EX1811)	20181108T183458.000Z	857.959	17.8566	-67.0512	3.02245	6.58772	34.8699	Sargassum	medium	3	Sediment, marine snow	No
EX1811_Dive08	NOAA OER Océano Profundo 2018 (EX1811)	20181108T183716.000Z	857.245	17.8568	-67.0512	3.0251	6.62405	34.8715	Sargassum	high	5	Sediment, marine snow	No
EX1811_Dive08	NOAA OER Océano Profundo 2018 (EX1811)	20181108T184006.000Z	857.706	17.8568	-67.0511	3.02637	6.61893	34.8633	Sargassum	low	2	Sediment, marine snow	No
EX1811_Dive08	NOAA OER Océano Profundo 2018 (EX1811)	20181108T184051.000Z	857.914	17.8568	-67.0511	3.00704	6.66463	34.8754	Sargassum	low	2	Sediment, marine snow	No
EX1811_Dive08	NOAA OER Océano Profundo 2018 (EX1811)	20181108T184337.000Z	856.327	17.8568	-67.0511	2.94003	6.8189	34.8683	Sargassum	low	2	Sediment, marine snow	Holothuroidea	Near a wood fall
EX1811_Dive08	NOAA OER Océano Profundo 2018 (EX1811)	20181108T184540.000Z	855.496	17.8569	-67.0511	2.91362	6.87918	34.868	Sargassum	low	2	Sediment, marine snow	Rajiformes
EX1811_Dive08	NOAA OER Océano Profundo 2018 (EX1811)	20181108T185227.000Z	852.942	17.857	-67.0508	2.97576	6.728	34.8683	Sargassum	low	2	Sediment, marine snow	No
EX1811_Dive08	NOAA OER Océano Profundo 2018 (EX1811)	20181108T185427.000Z	853.448	17.8571	-67.0508	2.99371	6.6805	34.8691	Sargassum	low	2	Sediment, marine snow	Isopada, Decapoda
EX1811_Dive08	NOAA OER Océano Profundo 2018 (EX1811)	20181108T185536.000Z	852.477	17.8571	-67.0508	2.98703	6.68114	34.872	Sargassum	medium	4	Sediment, marine snow	Isopada	Sargassum in small depression
EX1811_Dive08	NOAA OER Océano Profundo 2018 (EX1811)	20181108T185542.000Z	852.12	17.8571	-67.0508	2.98347	6.71657	34.8688	Sargassum	medium	3	Sediment, marine snow	Isopada
EX1811_Dive08	NOAA OER Océano Profundo 2018 (EX1811)	20181108T185643.000Z	849.864	17.8571	-67.0508	2.98628	6.70692	34.8686	Sargassum	medium	3	Sediment, marine snow	No
EX1811_Dive08	NOAA OER Océano Profundo 2018 (EX1811)	20181108T190113.000Z	851.143	17.8571	-67.0507	2.98734	6.70186	34.8679	Sargassum	low	1	Sediment, marine snow	No
EX1811_Dive08	NOAA OER Océano Profundo 2018 (EX1811)	20181108T190258.000Z	849.656	17.8572	-67.0506	2.97915	6.70993	34.868	Sargassum	medium	4	Sediment, marine snow	No	Sargassum in multiple clumps, Sargassum in small depression
EX1811_Dive08	NOAA OER Océano Profundo 2018 (EX1811)	20181108T190327.000Z	848.412	17.8572	-67.0506	2.98495	6.7153	34.8684	Sargassum	high	5	Sediment, marine snow	No	Sargassum in multiple clumps
EX1811_Dive08	NOAA OER Océano Profundo 2018 (EX1811)	20181108T191355.000Z	845.158	17.8573	-67.0504	2.93417	6.83705	34.8677	Sargassum	medium	3	Sediment, marine snow	No
EX1811_Dive08	NOAA OER Océano Profundo 2018 (EX1811)	20181108T191449.000Z	843.948	17.8573	-67.0504	2.91131	6.8837	34.871	Sargassum	high	5	Sediment, marine snow	No
EX1811_Dive08	NOAA OER Océano Profundo 2018 (EX1811)	20181108T191847.000Z	842.387	17.8574	-67.0503	2.90469	6.91361	34.8704	Sargassum	high	5	Sediment, marine snow	No	Sargassum in small depression
EX1811_Dive08	NOAA OER Océano Profundo 2018 (EX1811)	20181108T192141.000Z	839.98	17.8574	-67.0501	2.89198	6.95874	34.8708	Sargassum	medium	3	Sediment, marine snow	No	Sargassum in multiple clumps
EX1811_Dive08	NOAA OER Océano Profundo 2018 (EX1811)	20181108T192206.000Z	839.058	17.8575	-67.0501	2.88877	6.96572	34.8708	Sargassum	medium	3	Sediment, marine snow	No
EX1811_Dive08	NOAA OER Océano Profundo 2018 (EX1811)	20181108T192336.000Z	835.108	17.8575	-67.0501	2.85879	7.07558	34.8752	Sargassum	low	2	Sediment, marine snow	Anguilliformes
EX1811_Dive08	NOAA OER Océano Profundo 2018 (EX1811)	20181108T192627.000Z	832.51	17.8575	-67.0501	2.84383	7.10283	34.877	Sargassum	medium	3	Sediment, marine snow	No	Sargassum in small depression
EX1811_Dive08	NOAA OER Océano Profundo 2018 (EX1811)	20181108T193013.000Z	831.454	17.8575	-67.0501	2.85629	7.09848	34.877	Sargassum	medium	4	Sediment, marine snow	No
EX1811_Dive08	NOAA OER Océano Profundo 2018 (EX1811)	20181108T193301.000Z	829.91	17.8575	-67.05	2.85575	7.10817	34.8775	Sargassum	low	2	Sediment, marine snow	Decapoda	Near a wood fall
EX1811_Dive08	NOAA OER Océano Profundo 2018 (EX1811)	20181108T193711.000Z	822.928	17.8576	-67.0498	2.83736	7.1751	34.8803	Sargassum	medium	3	Sediment, marine snow	No	Sargassum in multiple clumps
EX1811_Dive08	NOAA OER Océano Profundo 2018 (EX1811)	20181108T193810.000Z	822.124	17.8577	-67.0498	2.83941	7.1673	34.8803	Sargassum	low	2	Sediment, marine snow	No
EX1811_Dive08	NOAA OER Océano Profundo 2018 (EX1811)	20181108T193844.000Z	820.777	17.8577	-67.0498	2.84296	7.17086	34.8801	Sargassum	medium	4	Sediment, marine snow	No	Sargassum in multiple clumps, near a wood fall
EX1811_Dive08	NOAA OER Océano Profundo 2018 (EX1811)	20181108T194009.000Z	819.037	17.8577	-67.0498	2.83538	7.16767	34.8817	Sargassum	low	2	Sediment, marine snow	No
EX1811_Dive08	NOAA OER Océano Profundo 2018 (EX1811)	20181108T194248.000Z	817.945	17.8576	-67.0498	2.83643	7.17442	34.8817	Sargassum	medium	4	Sediment, marine snow	No	Sargassum in small depression
EX1811_Dive08	NOAA OER Océano Profundo 2018 (EX1811)	20181108T194522.000Z	816.864	17.8577	-67.0498	2.83545	7.15018	34.8809	Sargassum	low	1	Sediment, marine snow	No
EX1811_Dive08	NOAA OER Océano Profundo 2018 (EX1811)	20181108T194833.000Z	814.138	17.8578	-67.0496	2.83963	7.16133	34.8794	Sargassum	low	1	Sediment, marine snow	No
EX1811_Dive08	NOAA OER Océano Profundo 2018 (EX1811)	20181108T195114.000Z	812.194	17.8578	-67.0494	2.84264	7.145	34.8794	Sargassum	low	1	Sediment, marine snow	No
EX1811_Dive08	NOAA OER Océano Profundo 2018 (EX1811)	20181108T195214.000Z	809.932	17.8578	-67.0494	2.84903	7.13725	34.8786	Sargassum	high	5	Sediment, marine snow	No
EX1811_Dive08	NOAA OER Océano Profundo 2018 (EX1811)	20181108T195254.000Z	809.16	17.8578	-67.0495	2.84174	7.13934	34.8779	Sargassum	high	6	Sediment, marine snow	No
EX1811_Dive08	NOAA OER Océano Profundo 2018 (EX1811)	20181108T195505.000Z	807.252	17.8578	-67.0494	2.84924	7.14306	34.8789	Sargassum	medium	4	Sediment, marine snow	No	Sargassum in multiple clumps
EX1811_Dive08	NOAA OER Océano Profundo 2018 (EX1811)	20181108T195536.000Z	806.583	17.8578	-67.0495	2.84164	7.14939	34.8794	Sargassum	high	6	Sediment, marine snow	No
EX1811_Dive10	NOAA OER Océano Profundo 2018 (EX1811)	20181110T140732.000Z	2763.44	18.7515	-67.5871	5.57922	2.84643	34.9426	Sargassum	high	6	Boulder pile at bottom of canyon	No
EX1811_Dive10	NOAA OER Océano Profundo 2018 (EX1811)	20181110T141513.000Z	2763.89	18.7514	-67.5872	5.59676	2.85052	34.9428	Sargassum	high	7	Boulder pile at bottom of canyon, marine snow, sediment	No
EX1811_Dive10	NOAA OER Océano Profundo 2018 (EX1811)	20181110T141534.000Z	2763.43	18.7514	-67.5871	5.58505	2.8499	34.9446	Sargassum	high	6	Boulder pile at bottom of canyon, marine snow, sediment	No
EX1811_Dive10	NOAA OER Océano Profundo 2018 (EX1811)	20181110T142006.000Z	2763.74	18.7516	-67.5871	5.59754	2.83383	34.943	Likely Sargassum	high	6	Boulders, sediment, slight slope	Notacanthiformes
EX1811_Dive10	NOAA OER Océano Profundo 2018 (EX1811)	20181110T142046.000Z	2763.54	18.7515	-67.5871	5.58519	2.83618	34.9438	Sargassum	medium	3	Boulders, sediment, marine snow, slight slope	Asteroidea
EX1811_Dive10	NOAA OER Océano Profundo 2018 (EX1811)	20181110T142214.000Z	2763.94	18.7514	-67.5871	5.58146	2.84912	34.9442	Sargassum	high	8	Boulder pile at bottom of canyon, marine snow, sediment	No	Sargassum in multiple clumps
EX1811_Dive10	NOAA OER Océano Profundo 2018 (EX1811)	20181110T142416.000Z	2762.36	18.7516	-67.5872	5.56177	2.85001	34.9446	Sargassum	low	1	Sediment, marine snow	No	Anthropogenic debris
EX1811_Dive10	NOAA OER Océano Profundo 2018 (EX1811)	20181110T142718.000Z	2760.63	18.7514	-67.5872	5.5853	2.86138	34.9443	Sargassum	high	8	Boulder pile at bottom of canyon, marine snow, sediment	No	Sargassum in multiple clumps
EX1811_Dive10	NOAA OER Océano Profundo 2018 (EX1811)	20181110T142856.000Z	2757.71	18.7514	-67.5874	5.5904	2.85085	34.9459	Sargassum	low	2	Sediment, marine snow	No
EX1811_Dive10	NOAA OER Océano Profundo 2018 (EX1811)	20181110T143112.000Z	2758.28	18.7516	-67.5874	5.5629	2.85348	34.9453	Sargassum	low	2	Sediment, marine snow	No
EX1811_Dive10	NOAA OER Océano Profundo 2018 (EX1811)	20181110T143123.000Z	2758.13	18.7515	-67.5874	5.57201	2.85365	34.9452	Sargassum	medium	3	Boulders, sediment, slight slope	No
EX1811_Dive10	NOAA OER Océano Profundo 2018 (EX1811)	20181110T143149.000Z	2757.25	18.7515	-67.5873	5.57134	2.85348	34.9459	Sargassum	high	5	Boulder pile at bottom of canyon, marine snow, sediment	No
EX1811_Dive10	NOAA OER Océano Profundo 2018 (EX1811)	20181110T143207.000Z	2756.41	18.7515	-67.5873	5.57291	2.8546	34.9457	Sargassum	high	5	Boulder pile at bottom of canyon, marine snow, sediment	No
EX1811_Dive10	NOAA OER Océano Profundo 2018 (EX1811)	20181110T143230.000Z	2756.13	18.7514	-67.5873	5.57257	2.8532	34.9452	Sargassum	low	2	Boulders, sediment, slight slope, marine snow	No
EX1811_Dive10	NOAA OER Océano Profundo 2018 (EX1811)	20181110T143441.000Z	2754.93	18.7517	-67.5874	5.58961	2.85505	34.9452	Sargassum	low	1	Boulders, sediment, slight slope, marine snow	No
EX1811_Dive10	NOAA OER Océano Profundo 2018 (EX1811)	20181110T143611.000Z	2753.35	18.7515	-67.5874	5.58284	2.85679	34.9455	Sargassum	low	1	Boulders, sediment, slight slope, marine snow	No
EX1811_Dive10	NOAA OER Océano Profundo 2018 (EX1811)	20181110T143650.000Z	2753.62	18.7515	-67.5875	5.58561	2.856	34.9459	Sargassum	low	2	Boulders, sediment, slight slope, marine snow	No
EX1811_Dive10	NOAA OER Océano Profundo 2018 (EX1811)	20181110T144024.000Z	2749.19	18.7517	-67.5876	5.56634	2.86121	34.9459	Sargassum	low	1	Sediment, slight slope, marine snow	No
EX1811_Dive10	NOAA OER Océano Profundo 2018 (EX1811)	20181110T144506.000Z	2743.93	18.7517	-67.5878	5.57723	2.86507	34.9464	Sargassum	low	1	Boulder pile at bottom of canyon, marine snow, sediment	No	Near a wood fall
EX1811_Dive10	NOAA OER Océano Profundo 2018 (EX1811)	20181110T145508.000Z	2725.6	18.7518	-67.5879	5.58369	2.87554	34.9487	Sargassum	low	1	Rocky canyon wall, sediment, marine snow	Holothuria
EX1811_Dive10	NOAA OER Océano Profundo 2018 (EX1811)	20181110T152457.000Z	2670.71	18.7517	-67.5889	5.53573	3.0123	34.9582	Likely Sargassum	low	1	Rocky canyon wall, sediment, marine snow	No
EX1811_Dive10	NOAA OER Océano Profundo 2018 (EX1811)	20181110T160034.000Z	2619.35	18.7519	-67.5894	5.53998	3.04898	34.9608	Sargassum	low	1	Vertical rock face, sediment, marine snow	No
EX1811_Dive10	NOAA OER Océano Profundo 2018 (EX1811)	20181110T161331.000Z	2598.99	18.7519	-67.5895	5.52861	3.0636	34.9622	Likely Sargassum	low	1	Vertical rock face, sediment, marine snow	No
EX1811_Dive10	NOAA OER Océano Profundo 2018 (EX1811)	20181110T164103.000Z	2564.35	18.7519	-67.59	5.52908	3.08201	34.9662	Likely Sargassum	low	2	Vertical rock face, sediment, marine snow	No
EX1811_Dive10	NOAA OER Océano Profundo 2018 (EX1811)	20181110T164435.000Z	2552.43	18.7518	-67.59	5.49631	3.13393	34.9691	Sargassum	low	1	Vertical rock face, sediment, marine snow	Hexactinellida
EX1903L2_Dive02	NOAA OER Windows to the Deep 2019 (EX1903L2)	20190622T142007.000Z	782.004	29.1138	-79.4475	3.5138	8.21056	35.14	Sargassum	low	2	coral rubble	No
EX1903L2_Dive02	NOAA OER Windows to the Deep 2019 (EX1903L2)	20190622T145220.000Z	776.75	29.1132	-79.4467	3.46556	8.23296	35.1414	Sargassum	medium	3	coral rubble	Anguilliformes, Ophiuroidea	Strong current
EX1903L2_Dive02	NOAA OER Windows to the Deep 2019 (EX1903L2)	20190622T165437.000Z	751.006	29.1112	-79.446	3.4242	8.27621	35.1448	Likely Sargassum	low	2	coral rubble	No
EX1903L2_Dive02	NOAA OER Windows to the Deep 2019 (EX1903L2)	20190622T170019.000Z	754.317	29.1111	-79.446	3.42732	8.27508	35.1444	Likely Sargassum	low	2	coral rubble, marine snow	No	Strong current
EX1903L2_Dive02	NOAA OER Windows to the Deep 2019 (EX1903L2)	20190622T170610.000Z	762.965	29.1109	-79.4461	3.42387	8.27554	35.1441	Sargassum	low	2	coral rubble, sediment, marine snow	Actinopterygii	Strong current
EX1903L2_Dive02	NOAA OER Windows to the Deep 2019 (EX1903L2)	20190622T170845.000Z	763.097	29.1108	-79.4462	3.42117	8.27636	35.1442	Sargassum	medium	3	coral rubble, sediment, marine snow	No	Strong current
EX1903L2_Dive02	NOAA OER Windows to the Deep 2019 (EX1903L2)	20190622T172300.000Z	763.204	29.1108	-79.4463	3.41913	8.27636	35.1445	Sargassum	low	2	coral rubble, rock, sediment, marine snow	Decapoda, Asteroidea	Strong current
EX1903L2_Dive02	NOAA OER Windows to the Deep 2019 (EX1903L2)	20190622T172314.000Z	763.279	29.1108	-79.4463	3.4186	8.27636	35.1445	Sargassum	low	2	coral rubble, rock, sediment, marine snow	Echinothurioida	Strong current
EX1903L2_Dive02	NOAA OER Windows to the Deep 2019 (EX1903L2)	20190622T172518.000Z	763.275	29.1107	-79.4462	3.42244	8.2759	35.1446	Sargassum	low	1	coral rubble, sediment, marine snow	No	Strong current
EX1903L2_Dive02	NOAA OER Windows to the Deep 2019 (EX1903L2)	20190622T172726.000Z	762.694	29.1106	-79.4461	3.42549	8.27652	35.144	Sargassum	low	2	coral rubble, sediment, marine snow	No	Strong current, Sargassum slowly tumbling
EX1903L2_Dive02	NOAA OER Windows to the Deep 2019 (EX1903L2)	20190622T172925.000Z	761.325	29.1105	-79.4462	3.42498	8.27575	35.145	Sargassum	low	1	coral rubble, sediment, marine snow	Echinothurioida	strong current, Urchin appears to be grazing on Sargassum
EX1903L2_Dive02	NOAA OER Windows to the Deep 2019 (EX1903L2)	20190622T174127.000Z	759.786	29.1104	-79.4462	3.42418	8.2759	35.1439	Sargassum	low	1	Coral rubble. rock, sediment, marine snow	No	Strong current
EX1903L2_Dive02	NOAA OER Windows to the Deep 2019 (EX1903L2)	20190622T175447.000Z	758.983	29.1104	-79.4462	3.42053	8.27734	35.1442	Sargassum	low	2	Coral rubble. rock, sediment, marine snow	No	Strong current
EX1903L2_Dive02	NOAA OER Windows to the Deep 2019 (EX1903L2)	20190622T180947.000Z	758.825	29.1102	-79.4465	3.42674	8.28043	35.1446	Sargassum	low	1	coral rubble, sediment, marine snow	No	Strong current
EX1903L2_Dive02	NOAA OER Windows to the Deep 2019 (EX1903L2)	20190622T181127.000Z	755.153	29.1102	-79.4465	3.41554	8.28064	35.1448	Sargassum	medium	3	coral rubble, sediment, marine snow	No	Strong current
EX1903L2_Dive02	NOAA OER Windows to the Deep 2019 (EX1903L2)	20190622T190848.000Z	743.176	29.1093	-79.4475	3.42083	8.28074	35.1453	Sargassum	medium	3	coral rubble, marine snow	Gastropoda, Ophiuroidea	Strong current
EX1903L2_Dive11	NOAA OER Windows to the Deep 2019 (EX1903L2)	20190703T184939.000Z	1318.41	35.624	-74.748	5.75085	4.117	34.9644	Likely Sargassum	low	2	Thick sediment, heavy marine snow	Anguilliformes
EX1903L2_Dive11	NOAA OER Windows to the Deep 2019 (EX1903L2)	20190703T191214.000Z	1307.5	35.6239	-74.7482	5.74553	4.12347	34.963	Likely Sargassum	low	1	Thick sediment, heavy marine snow	Anguilliformes, Pleuronectiformes
EX1903L2_Dive11	NOAA OER Windows to the Deep 2019 (EX1903L2)	20190703T191551.000Z	1305.07	35.6239	-74.7483	5.74335	4.12825	34.9628	Likely Sargassum	low	1	Thick sediment, heavy marine snow	Scorpaeniformes
EX1903L2_Dive11	NOAA OER Windows to the Deep 2019 (EX1903L2)	20190703T195316.000Z	1285.32	35.6236	-74.7485	5.71988	4.15996	34.9693	Sargassum	low	1	Canyon wall, thick sediment, heavy marine snow	No
EX1903L2_Dive11	NOAA OER Windows to the Deep 2019 (EX1903L2)	20190703T201725.000Z	1268.47	35.6234	-74.7486	5.71205	4.2099	34.9677	Likely Sargassum	low	2	Canyon wall, thick sediment, heavy marine snow	No	Sargassum partially covered in silt layer
EX1903L2_Dive11	NOAA OER Windows to the Deep 2019 (EX1903L2)	20190703T203351.000Z	1248.36	35.6232	-74.7488	5.70586	4.22421	34.9672	Sargassum	low	2	Canyon wall, thick sediment, heavy marine snow	No	Sargassum partially covered in silt layer
E1907_Dive11	NOAA OER 2019 Southeast US Deep-Sea (EX1907)	20191118T144536.000Z	1215.8	23.9761	-81.9324	4.90593	4.30071	34.9512	Sargassum	low	1	Sediment, marine snow	Notacanthiformes
E1907_Dive11	NOAA OER 2019 Southeast US Deep-Sea (EX1907)	20191118T150054.000Z	1217.22	23.9761	-81.9325	4.91574	4.30667	34.9549	Sargassum	medium	3	Sediment, marine snow	No
E1907_Dive11	NOAA OER 2019 Southeast US Deep-Sea (EX1907)	20191118T191649.000Z	1204.59	23.9786	-81.9391	4.84924	4.31504	34.9501	Sargassum	low	1	Sediment, marine snow	Octopoda	Sargassum in multiple clumps
E1907_Dive11	NOAA OER 2019 Southeast US Deep-Sea (EX1907)	20191118T192307.000Z	1204.5	23.9786	-81.9392	4.85628	4.31636	34.95	Sargassum	low	2	Sediment, marine snow	No	Sargassum in multiple clumps
E1907_Dive11	NOAA OER 2019 Southeast US Deep-Sea (EX1907)	20191118T192555.000Z	1203.59	23.9787	-81.9393	4.84352	4.31696	34.9503	Sargassum	medium	4	Sediment, marine snow	Oegopsida	Sargassum appears very degraded, anthropogenic debris
E1907_Dive11	NOAA OER 2019 Southeast US Deep-Sea (EX1907)	20191118T192655.000Z	1203.63	23.9787	-81.9393	4.8428	4.31647	34.9499	Sargassum	medium	4	Sediment, marine snow		Sargassum appears very degraded
EX1907_Dive12	NOAA OER 2019 Southeast US Deep-Sea (EX1907)													No Sargassum observed
